# Supplementary material
Source: publisher figshare collection journal article supplement (https://acs.figshare.com/ndownloader/files/3984862)
Supplement: Supplementary file 1 [file 3984862]

## Sheet: Sheet1
Protein ID	Locus	Gene Name	Protein Name/Description	t-test Significant (before impute)	-log10 (p-value) (before imputing)	log2 [BCG/Rv] (before impute)	t-test Significant (after impute)	-log10 (p-value) (after imputing)	log2 [BCG/Rv] (after impute)	Filter1:≥ 2 peptides in 4/6 replicates	Filter2: ≥ log 2-fold change, and p < 0.05	BCG only filter	Functional Category	SignalP	TatP	TM HMM	Lipoprotein
gi|15608805	Rv1667c		macrolide-transport ATP-binding protein ABC transporter		0	NaN	+	5.55498	5.24091	+		+	6
gi|15607924	Rv0784		hypothetical protein		0	NaN	+	5.24809	6.47434	+		+	4
gi|15608912	Rv1774		oxidoreductase	+	2.57057	5.67349	+	4.16164	5.39662	+	+	+	2
gi|15608806	Rv1668c		macrolide-transport ATP-binding protein ABC transporter		0	NaN	+	4.07446	4.24589	+		+	6
gi|15609565	Rv2428	ahpC	alkyl hydroperoxide reductase		0	NaN	+	3.9126	6.22146	+		+	7
gi|15609025	Rv1888c		transmembrane protein	+	1.60512	3.55209	+	3.8427	4.98487	+	+	+	6			3
gi|15610369	Rv3233c		hypothetical protein	+	1.56547	3.40894	+	3.73806	5.15332	+	+	+	1
gi|15610026	Rv2889c	tsf	elongation factor Ts	+	2.0307	3.68295	+	3.5943	4.31736	+	+	+	5
gi|15610370	Rv3234c		hypothetical protein	+	1.3822	3.159	+	3.5589	4.97874	+	+	+	1
gi|15608913	Rv1775		hypothetical protein		0	4.04258	+	3.55864	5.17589	+		+	4
gi|15610121	Rv2984	ppk	polyphosphate kinase	+	2.12142	4.1148	+	3.44851	4.03223	+	+	+	2
gi|15608782	Rv1644	tsnR	23S rRNA methyltransferase	+	1.69492	3.98798	+	3.12476	4.48742	+	+	+	5
gi|15608066	Rv0926c		hypothetical protein		0	1.8298	+	3.03599	3.97778	+		+	4
gi|15610017	Rv2880c		hypothetical protein		0	NaN	+	2.96131	4.24277	+		+	4
gi|15609053	Rv1916	aceAb	isocitrate lyase		0	0.626688	+	2.92708	4.98326	+		+	2
gi|15608622	Rv1484	inhA	enoyl-ACP reductase	+	1.69066	3.15268	+	2.53353	3.93342	+	+	+	1
gi|15609339	Rv2202c	cbhK	carbohydrate kinase CbhK		0.614611	1.46378	+	2.51569	4.06276	+		+	2
gi|15607636	Rv0495c		hypothetical protein		1.2706	2.28534	+	2.49569	2.83567	+		+	4
gi|15608400	Rv1260		hypothetical protein		0.752321	2.48873	+	2.47081	3.7949	+		+	2
gi|15608234	Rv1094	desA2	acyl-ACP desaturase	+	1.63901	2.73722	+	2.45837	3.33571	+	+	+	1
gi|15610016	Rv2879c		hypothetical protein		0.583399	1.7677	+	2.45835	4.45011	+		+	4
gi|15608788	Rv1650	pheT	phenylalanyl-tRNA synthetase subunit beta		0.599833	1.67931	+	2.35082	3.38184	+		+	5
gi|15608792	Rv1654	argB	acetylglutamate kinase		0	NaN	+	2.27607	3.52568	+		+	2
gi|15609933	Rv2796c	lppV	lipoprotein LppV		0.458564	1.34711	+	2.17215	3.26607	+		+	6				X
gi|57117147	Rv3722c		hypothetical protein		0	2.79094	+	2.17099	3.59227	+		+	4
gi|15610094	Rv2957		glycosyl transferase family protein	+	1.84355	3.12526	+	2.15168	3.69655	+	+	+	2			1
gi|15610182	Rv3045	adhC	NADP-dependent alcohol dehydrogenase ADHC		0.343466	1.32386	+	2.14898	4.91722	+		+	2
gi|15609472	Rv2335	cysE	serine acetyltransferase CysE		0.381346	1.3496	+	2.14334	4.23095	+		+	2
gi|15610474	Rv3338		hypothetical protein		0	0.564008	+	2.09293	4.01057	+		+	4
gi|15608989	Rv1852	ureG	urease accessory protein ureG	+	1.75977	2.78995	+	2.03257	3.38884	+	+	+	2
gi|15607208	Rv0066c	icd2	isocitrate dehydrogenase		0.775576	2.04763	+	1.95569	3.42206	+		+	2
gi|15609566	Rv2429	ahpD	alkyl hydroperoxide reductase		0.214928	0.769182	+	1.87342	3.52112	+		+	7
gi|15610360	Rv3224		short-chain dehydrogenase		1.06774	2.31196	+	1.80977	3.36785	+		+	2
gi|15610418	Rv3282	maf	Maf-like protein		0	NaN	+	1.79578	3.54264	+		+	4
gi|15609729	Rv2592c	ruvB	Holliday junction DNA helicase RuvB		0.254358	0.946435	+	1.7948	3.18077	+		+	5
gi|15608751	Rv1613	trpA	tryptophan synthase subunit alpha		0.642507	1.76966	+	1.79022	3.34028	+		+	2
gi|15611025	Rv3889c		hypothetical protein		0	2.85256	+	1.78328	2.7296	+		+	6
gi|15607830	Rv0690c		hypothetical protein	+	1.77088	2.21984	+	1.77088	2.21984	+	+	+	4
gi|15610021	Rv2884		transcriptional regulatory protein		0.626638	1.39677	+	1.76114	2.65272	+		+	3
gi|15607353	Rv0212c	nadR	transcriptional regulator NadR		1.12423	1.22597	+	1.73588	1.39496	+		+	3
gi|15610085	Rv2948c	fadD22	acyl-CoA synthetase		0.9817	2.3323	+	1.65487	3.55655	+		+	1
gi|15609503	Rv2366c		transmembrane protein	+	1.63013	2.94707	+	1.63013	2.94707	+	+	+	6			3
gi|15607290	Rv0148		short-chain type dehydrogenase/reductase		0.892188	2.09734	+	1.6094	3.25624	+		+	2
gi|57116734	Rv0467	icl	isocitrate lyase		0.0704777	0.30991	+	1.60491	3.52291	+		+	2
gi|15608150	Rv1010	ksgA	dimethyladenosine transferase		0.876139	2.40216	+	1.58541	3.74075	+		+	5
gi|15610075	Rv2938	drrC	daunorubicin-DIM-transport integral membrane protein ABC transporter DrrC		0.0495526	-0.188269	+	1.56212	4.09166	+		+	6			6
gi|15608818	Rv1680		hypothetical protein		0.852852	1.46112	+	1.54098	2.62394	+		+	4
gi|15610065	Rv2928	tesA	thioesterase		0.503076	1.50906	+	1.53299	2.24341	+		+	1
gi|15610356	Rv3220c		two component sensor kinase		0.047996	0.205905	+	1.49355	3.33454	+		+	3
gi|15607607	Rv0466		hypothetical protein		0.536469	1.3603	+	1.48999	2.4115	+		+	4
gi|15607390	Rv0249c		succinate dehydrogenase membrane anchor subunit		0.264601	1.30086	+	1.37284	5.16886	+		+	2			5
gi|15610176	Rv3039c	echA17	enoyl-CoA hydratase		0	2.60794	+	1.32373	2.70264	+		+	1
gi|15610532	Rv3396c	guaA	GMP synthase		0.0110983	0.0675314		1.30068	3.58181	+		+	2
gi|15608974	Rv1837c	glcB	malate synthase G		0	-1.06397		1.29624	2.10418	+		+	2
gi|57116856	Rv1384	carB	carbamoyl phosphate synthase large subunit		0.837758	2.05414		1.29459	2.30945	+		+	2
gi|15608423	Rv1283c	oppB	oligopeptide-transport integral membrane protein ABC transporter OppB		0.121259	-0.436819		1.27656	2.83702	+		+	6			6
gi|15610656	Rv3520c		coenzyme F420-dependent oxidoreductase		0.211884	0.680432		1.25707	3.01755	+		+	2
gi|15609246	Rv2109c	prcA	proteasome PrcA		0.285381	0.754326		1.25596	2.276	+		+	2
gi|15609365	Rv2228c		ribonuclease H		0	-1.96774		1.2457	2.54784	+		+	5
gi|15610859	Rv3723		transmembrane protein		1.23748	1.55849		1.23748	1.55849	+		+	6			4
gi|15610020	Rv2883c	pyrH	uridylate kinase		0.906468	1.822		1.21646	2.48482	+		+	2
gi|15609634	Rv2497c	pdhA	pyruvate dehydrogenase E1 component alpha subunit PdhA		0.351807	1.23909		1.20886	2.51369	+		+	2
gi|15610292	Rv3156	nuoL	NADH dehydrogenase subunit L		1.20385	1.19687		1.20385	1.19687	+		+	2			16
gi|15609696	Rv2559c		recombination factor protein RarA		0.88436	2.03478		1.20242	2.64531	+		+	4
gi|15608602	Rv1464	csd	cysteine desulfurase		0.29321	1.48107		1.18973	3.70163	+		+	2
gi|15608143	Rv1003		hypothetical protein		1.01249	2.52082		1.15427	2.76362	+		+	4
gi|15607343	Rv0202c	mmpL11	transmembrane transport protein MmpL11		0.559577	1.56282		1.14137	2.42216	+		+	6	X		12
gi|15610690	Rv3554	fdxB	electron transfer protein FdxB		0.878514	2.01589		1.13619	2.25933	+		+	2			4
gi|57116950	Rv2127	ansP1	L-asparagine permease ansP1		0.455146	1.18062		1.09615	2.36767	+		+	6			12
gi|15607385	Rv0244c	fadE5	acyl-CoA dehydrogenase		0	NaN		1.05912	1.50446	+		+	1
gi|15609020	Rv1883c		hypothetical protein		0.486526	1.56964		1.0444	3.32019	+		+	4
gi|15607188	Rv0046c	ino1	myo-inositol-1-phosphate synthase		0.22629	-0.913869		1.04399	2.74726	+		+	2
gi|15608455	Rv1315	murA	UDP-N-acetylglucosamine 1-carboxyvinyltransferase		0.113117	-0.574646		0.977379	2.58664	+		+	6
gi|15611002	Rv3866		hypothetical protein		0.219951	-0.899096		0.976789	2.54086	+		+	6
gi|15607357	Rv0216		hypothetical protein		0.0917404	-0.370988		0.966873	1.94459	+		+	2
gi|15610734	Rv3598c	lysS	lysyl-tRNA synthetase		0.201382	0.301996		0.966651	1.69624	+		+	5
gi|15610294	Rv3158	nuoN	NADH dehydrogenase subunit N		0.703244	1.5414		0.95468	2.76135	+		+	2			14
gi|15608280	Rv1140		hypothetical protein		0.931565	1.72131		0.931565	1.72131	+		+	6			6
gi|57116992	Rv2461c	clpP	ATP-dependent Clp protease proteolytic subunit		0.605404	1.42365		0.907825	2.0162	+		+	2
gi|15609599	Rv2462c	tig	trigger factor		0	-1.98176		0.905473	2.00924	+		+	6
gi|15608091	Rv0951	sucC	succinyl-CoA synthetase subunit beta		0.101506	0.541001		0.904177	2.92345	+		+	2
gi|15608380	Rv1240	mdh	malate dehydrogenase		0.0849778	-0.417787		0.899134	2.13158	+		+	2
gi|15607159	Rv0017c	rodA	cell division protein RodA		0.897483	1.68209		0.897483	1.68209	+		+	6			12
gi|15610718	Rv3582c	ispD	2-C-methyl-D-erythritol 4-phosphate cytidylyltransferase		0.0620213	-0.354114		0.891307	2.36952	+		+	2
gi|15608787	Rv1649				0.152336	-0.610472		0.886164	1.93726	+		+	5
gi|15610309	Rv3173c		TetR/ACRR family transcriptional regulator		0.566049	1.20406		0.861984	1.70842	+		+	3
gi|15607548	Rv0407	fgd1	F420-dependent glucose-6-phosphate dehydrogenase		0.00199073	0.00790723		0.855006	2.23276	+		+	2
gi|15607587	Rv0446c		transmembrane protein		0.105063	-0.435308		0.847256	1.69395	+		+	6			5
gi|15607783	Rv0643c	mmaA3	methoxy mycolic acid synthase		0.202974	-0.884851		0.843293	2.17236	+		+	1
gi|15609247	Rv2110c	prcB	proteasome PrcB	+	1.90228	2.599		0.837041	1.6862	+	+	+	2
gi|15609592	Rv2455c		oxidoreductase subunit alpha		0.253566	-0.719375		0.829161	1.58517	+		+	2
gi|57117021	Rv2766c	fabG	3-ketoacyl-ACP reductase		0.652385	1.31342		0.82798	1.43147	+		+	2
gi|15608099	Rv0959		hypothetical protein		0.301192	1.05322		0.795263	2.04624	+		+	4
gi|15608709	Rv1571		hypothetical protein		0.213064	0.601017		0.790665	1.78613	+		+	4
gi|15608214	Rv1074c	fadA3	acetyl-CoA acetyltransferase		0.522287	1.61948		0.772765	2.10502	+		+	1
gi|15608238	Rv1098c	fumC	fumarate hydratase		0.357953	-1.3783		0.772602	2.13709	+		+	2
gi|15607549	Rv0408	pta	phosphate acetyltransferase		0.039273	-0.189996		0.760318	1.65383	+		+	2
gi|15608613	Rv1475c	acn	aconitate hydratase		0.453065	1.58815		0.756637	1.90153	+		+	2
gi|15609537	Rv2400c	subI	sulfate ABC transporter substrate-binding protein		0.395381	-1.79421		0.748137	2.53565	+		+	6				X
gi|15610928	Rv3792		transmembrane protein		0.273218	1.02476		0.745305	2.06434	+		+	6			13
gi|15608978	Rv1841c		hypothetical protein		0.452775	1.2762		0.729744	1.87373	+		+	6			1
gi|15610297	Rv3161c		dioxygenase		0.0286776	-0.139371		0.728394	2.20281	+		+	2
gi|15608916	Rv1778c		hypothetical protein	+	1.59982	3.08516		0.707851	1.83729	+	+	+	4
gi|15610125	Rv2988c	leuC	isopropylmalate isomerase large subunit		0.00420285	-0.0166785		0.697626	1.7379	+		+	2
gi|15607668	Rv0528		transmembrane protein		0.109227	0.490334		0.677798	1.74906	+		+	6			4
gi|15607505	Rv0364		transmembrane protein		0.656614	1.51378		0.656614	1.51378	+		+	6			5
gi|15608085	Rv0945		short-chain dehydrogenase		0.370697	-1.68145		0.65107	2.51651	+		+	2
gi|15607541	Rv0400c	fadE7	acyl-CoA dehydrogenase		0.173978	0.825047		0.647178	2.28097	+		+	1
gi|15608817	Rv1679	fadE16	acyl-CoA dehydrogenase		0.509447	1.74197		0.640968	1.84089	+		+	1
gi|15610277	Rv3141	fadB4	NADPH quinone oxidoreductase		0.083887	-0.279754		0.633441	1.44116	+		+	1
gi|15608045	Rv0905	echA6	enoyl-CoA hydratase		0.414692	1.42122		0.631952	1.87631	+		+	1
gi|15610291	Rv3155	nuoK	NADH dehydrogenase subunit K		0.299852	0.76814		0.6275	1.87367	+		+	2			3
gi|15610264	Rv3127		hypothetical protein		0.621713	1.57713		0.621713	1.57713	+		+	4
gi|15607928	Rv0788	purQ	phosphoribosylformylglycinamidine synthase I		0.0857608	0.428304		0.604823	1.71637	+		+	2
gi|15608935	Rv1798		hypothetical protein		0.294864	-0.707885		0.60482	1.489	+		+	6
gi|15609315	Rv2178c	aroG	3-deoxy-D-arabinoheptulosonate-7-phosphate synthase		0.174269	0.841369		0.598769	1.49631	+		+	2
gi|15609267	Rv2130c	cysS	cysteinyl-tRNA synthetase		0.143419	0.723246		0.591184	1.32382	+		+	2
gi|15609338	Rv2201	asnB	asparagine synthetase AsnB		0.35679	1.02438		0.571481	1.42267	+		+	2
gi|15609094	Rv1957		hypothetical protein		0.761898	1.30872		0.570488	1.11496	+		+	4
gi|15609529	Rv2392	cysH	phosphoadenosine phosphosulfate reductase		0.372284	0.846603		0.569617	1.11515	+		+	2
gi|15610428	Rv3292		hypothetical protein		0.408816	-1.68385		0.56491	1.72904	+		+	4
gi|15608816	Rv1678		hypothetical protein		0.47086	1.17925		0.563765	1.52733	+		+	6			8
gi|15610637	Rv3501c	yrbE4A	hypothetical protein		0.224824	-0.304123		0.562108	-0.904089	+		+	7			6
gi|57117041	Rv2992c	gltX	glutamyl-tRNA synthetase		0.289848	0.834838		0.560559	1.4805	+		+	5
gi|15610849	Rv3713	cobQ2	cobyric acid synthase CobQ2		0.341986	0.925152		0.557414	1.76503	+		+	2
gi|15610942	Rv3806c		phosphoribose diphosphate:decaprenyl-phosphate phosphoribosyltransferase		0.715293	1.9646		0.5427	1.54015	+		+	6			7
gi|15608030	Rv0890c		LuxR family transcriptional regulator		0.569489	1.60037		0.523221	1.20315	+		+	3		X
gi|15607245	Rv0103c	ctpB	cation-transporter P-type ATPase B		0.286897	0.838958		0.511443	1.30831	+		+	6			7
gi|15608729	Rv1591		hypothetical protein		0.0119291	-0.0482736		0.507513	1.66189	+		+	6			4
gi|15608659	Rv1521	fadD25	acyl-CoA synthetase		0	-2.49187		0.506349	1.28041	+		+	1			1
gi|15607407	Rv0266c	oplA	5-oxoprolinase		0.325608	-0.955828		0.483491	-1.12692	+		+	2
gi|15608621	Rv1483	fabG1	3-oxoacyl-ACP reductase		0.260964	1.00803		0.476306	1.60194	+		+	1
gi|15610955	Rv3819		hypothetical protein		0.399158	1.35317		0.469196	1.63936	+		+	4
gi|15608048	Rv0908	ctpE	metal cation transporter ATPase P-type CtpE		0.329675	1.13739		0.457763	1.35237	+		+	6			9
gi|15609827	Rv2690c		hypothetical protein		0.572889	1.65486		0.457619	1.38976	+		+	6			11
gi|15609287	Rv2150c	ftsZ	cell division protein FtsZ		0.0213797	-0.126068		0.455787	1.55296	+		+	6
gi|15608851	Rv1713	engA	GTP-binding protein EngA		0.537616	2.46423		0.452677	1.73263	+		+	2
gi|15609372	Rv2235		transmembrane protein		0.160291	0.478081		0.450152	1.29416	+		+	6			3
gi|15608585	Rv1447c	zwf2	glucose-6-phosphate 1-dehydrogenase		0.455332	1.21729		0.444579	1.18608	+		+	2
gi|15609930	Rv2793c	truB	tRNA pseudouridine synthase B		0.514754	-2.04865		0.438954	1.42607	+		+	5
gi|15607609	Rv0468	fadB2	3-hydroxybutyryl-CoA dehydrogenase		0.432701	1.01883		0.432701	1.01883	+		+	1
gi|57116851	Rv1342c		hypothetical protein		0.136241	-0.425767		0.423819	-1.2726	+		+	6			3
gi|15610055	Rv2918c	glnD	PII uridylyl-transferase		0.0116008	-0.0552808		0.416883	0.895667	+		+	2
gi|15607707	Rv0567		methyltransferase/methylase		0.16947	0.407346		0.409075	0.877693	+		+	2
gi|15609874	Rv2737c	recA	DNA recombination protein RecA		0.216551	0.960733		0.404727	1.54502	+		+	5
gi|15610124	Rv2987c	leuD	isopropylmalate isomerase small subunit		0.150413	0.579984		0.400732	1.39783	+		+	2
gi|15607943	Rv0803	purL	phosphoribosylformylglycinamidine synthase II		0.354413	-0.945002		0.354413	-0.945002	+		+	2
gi|15610392	Rv3256c		hypothetical protein		0.337159	1.14911		0.337159	1.14911	+		+	4
gi|15610799	Rv3663c	dppD	peptide ABC transporter ATP-binding protein		0.127023	-0.353779		0.325098	0.702947	+		+	6
gi|15608540	Rv1402	priA	primosome assembly protein PriA		0	-2.53115		0.322919	0.820991	+		+	5
gi|15607703	Rv0563	htpX	heat shock protein HtpX		0.410696	1.09466		0.322193	1.02321	+		+	7			4
gi|15608992	Rv1855c		oxidoreductase		0.308731	0.890131		0.308731	0.890131	+		+	2
gi|15608933	Rv1796	mycP5	serine protease		0.307632	0.776593		0.307632	0.776593	+		+	2	X		2
gi|15607377	Rv0236c		transmembrane protein		0.201445	0.825007		0.306658	0.68962	+		+	6	X		9
gi|15610938	Rv3802c		hypothetical protein		0.298571	0.934532		0.298571	0.934532	+		+	6			1
gi|15607606	Rv0465c		transcriptional regulatory protein		0.153539	-0.801993		0.280007	0.903463	+		+	3
gi|15609676	Rv2539c	aroK	shikimate kinase		0.29348	-0.902945		0.276572	1.00629	+		+	2
gi|15607229	Rv0087	hycE	formate hydrogenase HycE		0.302464	-1.32464		0.263746	-0.941388	+		+	2
gi|57117083	Rv3287c				0.295599	-0.535432		0.25489	0.716916	+		+	5
gi|15608750	Rv1612	trpB	tryptophan synthase subunit beta		0.0760911	-0.365937		0.250604	0.786413	+		+	2
gi|15610131	Rv2994		hypothetical protein		0.240849	0.563553		0.240849	0.563553	+		+	6			8
gi|15608771	Rv1633				0.393539	1.50088		0.219574	0.749777	+		+	5
gi|15608124	Rv0984	moaB2	pterin-4-alpha-carbinolamine dehydratase		0.29169	0.838527		0.211756	0.861885	+		+	2
gi|57116735	Rv0469	umaA	mycolic acid synthase		0.01876	-0.10638		0.208	0.869633	+		+	1
gi|15610403	Rv3267		hypothetical protein		0.0975698	-0.430334		0.204703	0.546715	+		+	4	X		1
gi|15607202	Rv0060		hypothetical protein		0.0375411	-0.183216		0.203793	0.7497	+		+	4
gi|15608153	Rv1013	pks16	long-chain-fatty-acid--CoA ligase		0.0745028	-0.268387		0.201707	0.776976	+		+	1
gi|15608599	Rv1461		hypothetical protein		0	-2.95305		0.192894	0.552585	+		+	4
gi|15608402	Rv1262c		HIT-like protein		0.528724	1.15071		0.192496	0.537357	+		+	4
gi|15610199	Rv3062	ligB	ATP-dependent DNA ligase		0.193668	-0.937906		0.186929	0.632946	+		+	5
gi|15609564	Rv2427c	proA	gamma-glutamyl phosphate reductase		0.22514	0.777023		0.175468	0.591198	+		+	2
gi|57116723	Rv0346c	ansP2	L-asparagine ABC transporter permease		0.158169	0.472937		0.158169	0.472937	+		+	6			12
gi|15607269	Rv0127		hypothetical protein		0.00494625	-0.0233774		0.112357	0.454162	+		+	7
gi|15610780	Rv3644c		DNA polymerase III subunit delta'		0.052322	-0.201673		0.052322	-0.201673	+		+	5
gi|15610348	Rv3212		hypothetical protein		0.0484123	-0.235017		0.0520486	0.237281	+		+	4	X		1
gi|15607525	Rv0384c	clpB	endopeptidase ATP binding protein		0.0470279	-0.200283		0.0459882	0.183704	+		+	7
gi|15607234	Rv0092	ctpA	cation transporter P-type ATPase A		0.0374054	-0.100749		0.0374054	-0.100749	+		+	6			8
gi|15609717	Rv2580c	hisS	histidyl-tRNA synthetase		0.0330428	0.0915623		0.0282214	-0.110968	+		+	5
